# Supplementary material for: Janus nanocarriers for magnetically targeted and hyperthermia-enhanced curcumin therapy of liver cancer
Source: Royal Society of Chemistry journal article supplement (doi:10.1039/c8ra05694c), 2018-01-01
Supplement: c8ra05694c1.pdf [file c8ra05694c1.pdf]

## Supporting Information

### **Janus Nanocarriers for Magnetically Targeted and Hyperthermia-Enhanced Curcumin therapy of liver cancer**

Hao Xing,<sup>ab</sup> Zheng Wang,<sup>\*b</sup> Dan Shao,<sup>b</sup> Zhimin Chang,<sup>b</sup> Mingfeng Ge,<sup>b</sup> Li Li,<sup>b</sup> Mingdi Wu,<sup>b</sup> Zhuangzhi Yan<sup>\*a</sup> and Wenfei Dong<sup>\*b</sup>

<sup>a</sup> School of Communication and Information Engineering, Shanghai University, No. 99 Shangda Road, Shanghai 200444, China

<sup>b</sup> CAS Key Laboratory of Bio-Medical Diagnostics, Suzhou Institute of Biomedical Engineering and Technology, Chinese Academy of Sciences, Suzhou 215163, China.

\*Corresponding Author. Fax: +86 512-69588088; Tel: +86 512-69588307

E-mail address: wangz@sibet.ac.cn, zzyan@shu.edu.cn, wenfeidong@sibet.ac.cn

**Keywords:** Janus, Curcumin, liver cancer, magnetic target, magnetic hyperthermia therapy

## Materials

Polyacrylic acid (PAA, 8 mmol, Mw 1800), iron (III) chloride anhydrous ( $\text{FeCl}_3$ ), diethylene glycol (DEG), cetyltrimethyl ammonium bromide (CTAB), tetraethyl orthosilicate (TEOS, 98%), 3-Aminopropyltriethoxysilane (APS), fluorescein isothiocyanate (FITC), Sulforhodamine B (SRB) were purchased from Sigma-Aldrich. Cur was purchased from Sinopharm Chemical Reagent Co., Ltd. (Shanghai, China). Sodium hydroxide (NaOH), ammonium hydroxide ( $\text{NH}_4\text{OH}$ , 28%), ammonium nitrate ( $\text{NH}_4\text{NO}_3$ ), anhydrous ethanol, sucrose, succinic anhydride and hydrochloric acid were obtained from Beijing Chemical Reagent Co. (Beijing China). Dulbecco's modified Eagle medium-high glucose (DMEM-HG), RPMI-1640 medium and fetal bovine serum (FBS) were obtained from GIBCO. All reagents were commercially available products of analytical-grade purity and were used without further purification.

## Characterization

The histomorphology of the Janus M-MSNs was observed by means of transmission electron microscopy (TEM, JEM-2100, JEOL). The size and distribution of the Janus M-MSNs were determined through a Nano- ZS 90 Nanosizer (Malvern Instruments Ltd., Worcestershire, U.K.). The surface area was characterized via the Brunauer-Emmett-Teller (BET) method. The pore size distribution was calculated by the Barrett-Joyner-Halenda (BJH) method. Magnetization was measured by a TDM-B vibrating sample magnetometer (VSM) at 300 K. The temperature increased by magnetic hyperthermia was assessed by detecting the temperature of RPMI-1640 containing 10% FBS with diverse concentrations of Janus M-MSNs@Cur (0, 6.25, 12.5, 25, 50, 100  $\text{mg mL}^{-1}$ ) which was mediated by an alternative current magnetic field (ACMF).

## Statistical analysis

Data were represented as the mean  $\pm$ SD values. The statistical significance of the data was determined by Student's t-test.

**Figure Caption**

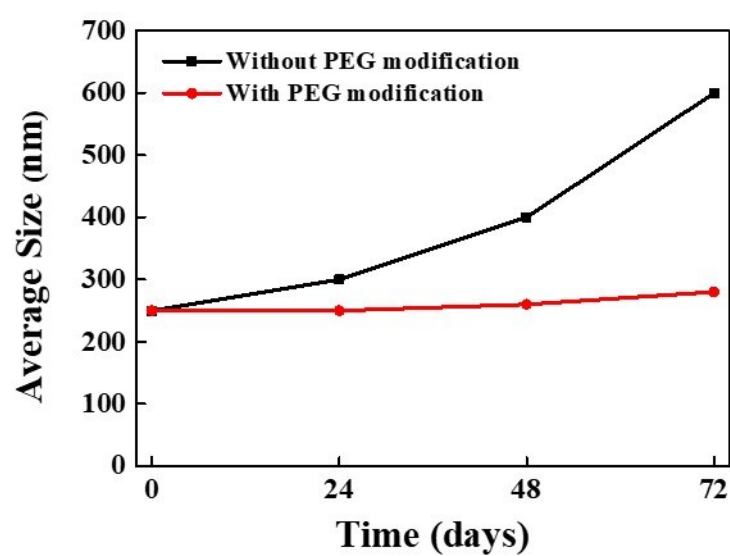

**Figure 1S.** Average size of Janus M-MSNs for 24, 48 and 72 hours.

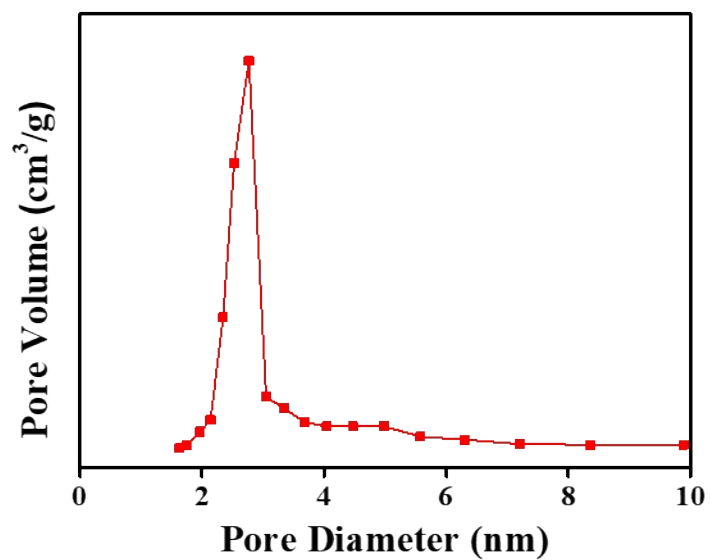

**Figure 2S.** Pore size distribution of Janus M-MSNs.

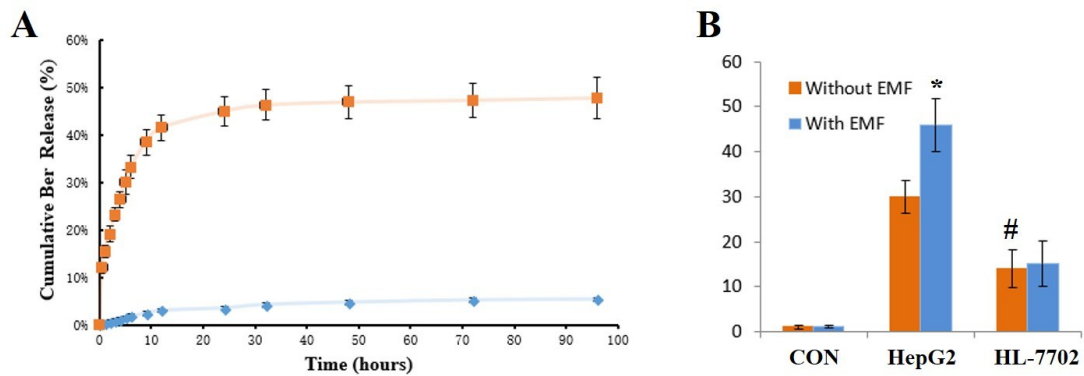

**Figure 3S.** pH-responsive Cur-release fashion of Janus M-MSNs-Cur. (A) pH- responsive Cur-release profiles of Janus M-MSNs-Cur. (B) Quantitative analysis of the biodistribution of Cur in free Cur or Janus M-MSNs-Cur treated HepG2 cells or HL-7702 cells in the absence or presence of EMF for 3 h. (2.5 h of incubation followed by 0.5 h exposure of magnetic field in EMF treated group). Data represent three separate experiments and are presented as the mean  $\pm$  SD \*P < 0.05 vs without EMF group in HepG2 cells; #P < 0.05 vs with or without EMF group in HepG2 cells
